# Supplementary material for: High Pressure Processing Impact on Emerging Mycotoxins (ENNA, ENNA1, ENNB, ENNB1) Mitigation in Different Juice and Juice-Milk Matrices
Source: MDPI journal article supplement (doi:10.3390/foods11020190), 2022-01-12
Supplement: s1 [file s1]

**Table S1.** Ingredients employed (per 100 mL) to prepare the different juice/milk beverages.

| Ingredients   | Orange Juice | Strawberry Juice | Grape Juice | Orange<br>Juice/Milk Juice | Strawberry<br>Juice/Milk Juice | Grape<br>Juice/Milk<br>Juice |
|---------------|--------------|------------------|-------------|----------------------------|--------------------------------|------------------------------|
| Juice         | 70 mL        | 50 mL            | 60 mL       | 50 mL                      | 30 mL                          | 50 mL                        |
| Skim milk     | 0 mL         | 0 mL             | 0 mL        | 20 mL                      | 20 mL                          | 20 mL                        |
| Bottled water | 30 mL        | 50 mL            | 40 mL       | 30 mL                      | 50 mL                          | 30 mL                        |
| Pectin        | 0.3 g        | 0.3 g            | 0.3 g       | 0.3 g                      | 0.3 g                          | 0.3 g                        |
| Sugar         | 7.5 g        | 7.5 g            | 7.5 g       | 7.5 g                      | 7.5 g                          | 7.5 g                        |
| Citric acid   | 0.1 g        | 0.1 g            | 0.1 g       | 0.1 g                      | 0.1 g                          | 0.1 g                        |
